# Supplementary material for: Regulatory Interplay Between FtsH, HflKC and YidC in Bacterial Membrane Protein Biogenesis and Quality Control
Source: Research Square preprint supplement (doi:10.21203/rs.3.rs-6895763/v1), 2025-06-18
Supplement: Supplementary file 1 [file bb1cac197234615d3a6d29d7.docx]

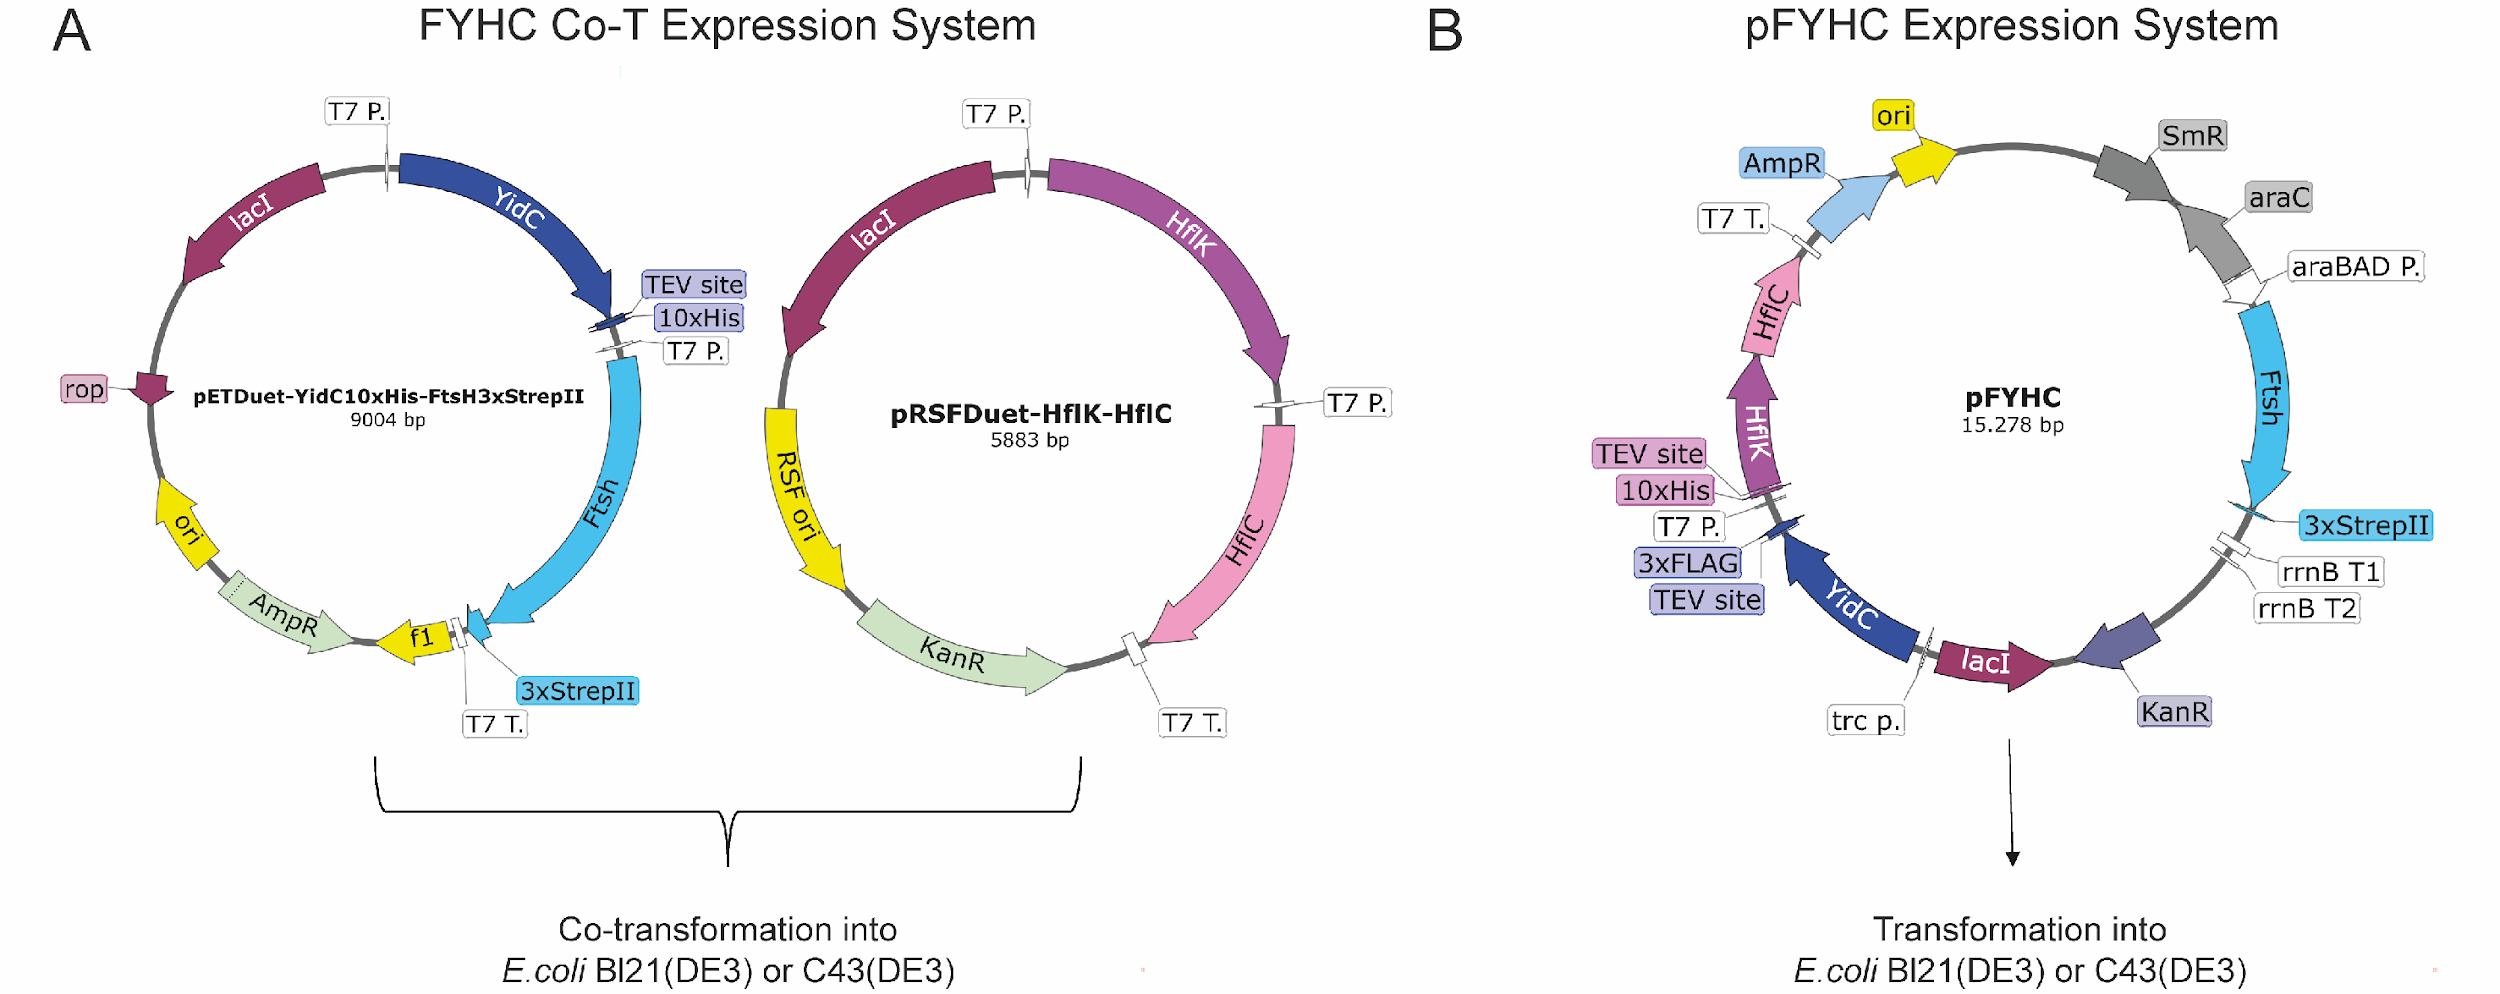


**Sup. Fig. 1. FYHC Co-T and pFYHC expression system.** A. In FYHC Co-T expression system, pETDuet plasmid has C-terminal 10xHis tagged YidC and C-terminal 3x StepTag II Tagged FtsH. B. pRSFDuet plasmid has HflK and HflC without tag. pETDuet has ampicillin and pRSFDuet has kanamycin resistance genes. Both plasmids were co-transfermed into *E. coli* Bl21 (DE3) or C43 (DE3) cells. B. In pFYHC expression system, a single plasmid, pFYHC, encodes 4 genes; FtsH-3xStreTagII under the arabinose promoter, 10xHis-HflK and HflC under the T7 promoter, YidC-3xFlagTag under the trc promoter. pFYHC plasmid was transformed into *E. coli* Bl21 (DE3) or C43 (DE3) cells and maintained with ampicilin, kanamycin and spectinomycin.

| **Primer Name** | **Sequence 5’-3’** | **Aim** |
| --- | --- | --- |
|  |  |  |
|  | **pRSFDuet-YidC10xHis-FtsH3xStrepTagII Design** |  |
| 1.FwpETDuet1 | AGCCATCACCATCATCACCAC | To linearize pETDuet-1 in the MCS-1 region |
| 1.RwpETDuet1 | CATGGTATATCTCCTTCTTAAAGTTAAAC |
| 2. FwYidC | CTTTAAGAAGGAGATATACCATGGATTCGCAACGCAATCTTTTAG | To amplify YidC-6xHis using the pFYHC plasmid as a template |
| 2. RwYidC | GTGGTGATGATGGTGATGGCTCTGAAAGTACAGATCCTCGG |
| FmutpETD3 | CACCACCACCATTAAAGCCAGGATCCGAATTCGAG | To convert YidC-6xHis to YidC-10xHis |
| RmutpETD3 | TTAATGGTGGTGGTGGTGGTGATGATGGTGATGGC |
| 1.2 FwpETDuetRev | ACCTAGGCTGCTGC | To linearize pETDuet-1-YidC-6xHis in the MCS-2 region |
| 1.2 RwpETDuet1 | CATATGTATATCTCCTTCTTATACTTAACTAATATAC |
| 2.FwFtsH | AGTATAAGAAGGAGATATACATATGGCGAAAAACCTAATACTCTGG | To amplify FtsH-3xStrepTagII using the pFYHC plasmid as a template |
| 2.RwFtsHRev | GTGGCAGCAGCCTAGGTCATTTCTCGAATTGTGGATGACTCCAGGACCCGGC |
|  |  |  |
|  | **pRSFDuet-HflK-HflC Design** |  |
| 3.FwpRSFDuet1 | GCGGCCGCATAATGCTTAAG | To linearize pRSFDuet-1 in the MCS-1 region |
| 3.RwpRSFDuet1 | CATGGTATATCTCCTTATTAAAGTTAAACAAAATTATTTC |
| 3.FwHflK | CTTTAATAAGGAGATATACCATGGCGTGGAATCAGCC | To amplify HflK using the pFYHC plasmid as a template |
| 3.RwHflK | CATTATGCGGCCGCTTATTCCCCCTGACGCTGGTAG |
| 3.2.FwpRSFDuet2 | ACCTAGGCTGCTGCCAC | To linearize pRSFDuet-HflK in the MCS-2 region |
| 3.2.RwpRSFDuet2 | CATATGTATATCTCCTTCTTATACTTAACTAATATAC |
| 3.FwHflC | AGTATAAGAAGGAGATATACATATGCGTAAGTCAGTTATCGCG | To amplify HflC using the pFYHC plasmid as a template |
| 3.RwHflC | GGCAGCAGCCTAGGTTAACGCGTTGCGGAAGTC |

**Sup. Table 1. Primers used in the design of the Co-T expression system.** NEB HiFi DNA Builder was used for cloning, and the prepared plasmids were transformed into *E. coli* NEB10B cells. The underlined sequences in the primers represent the overlapping regions used for cloning.

**
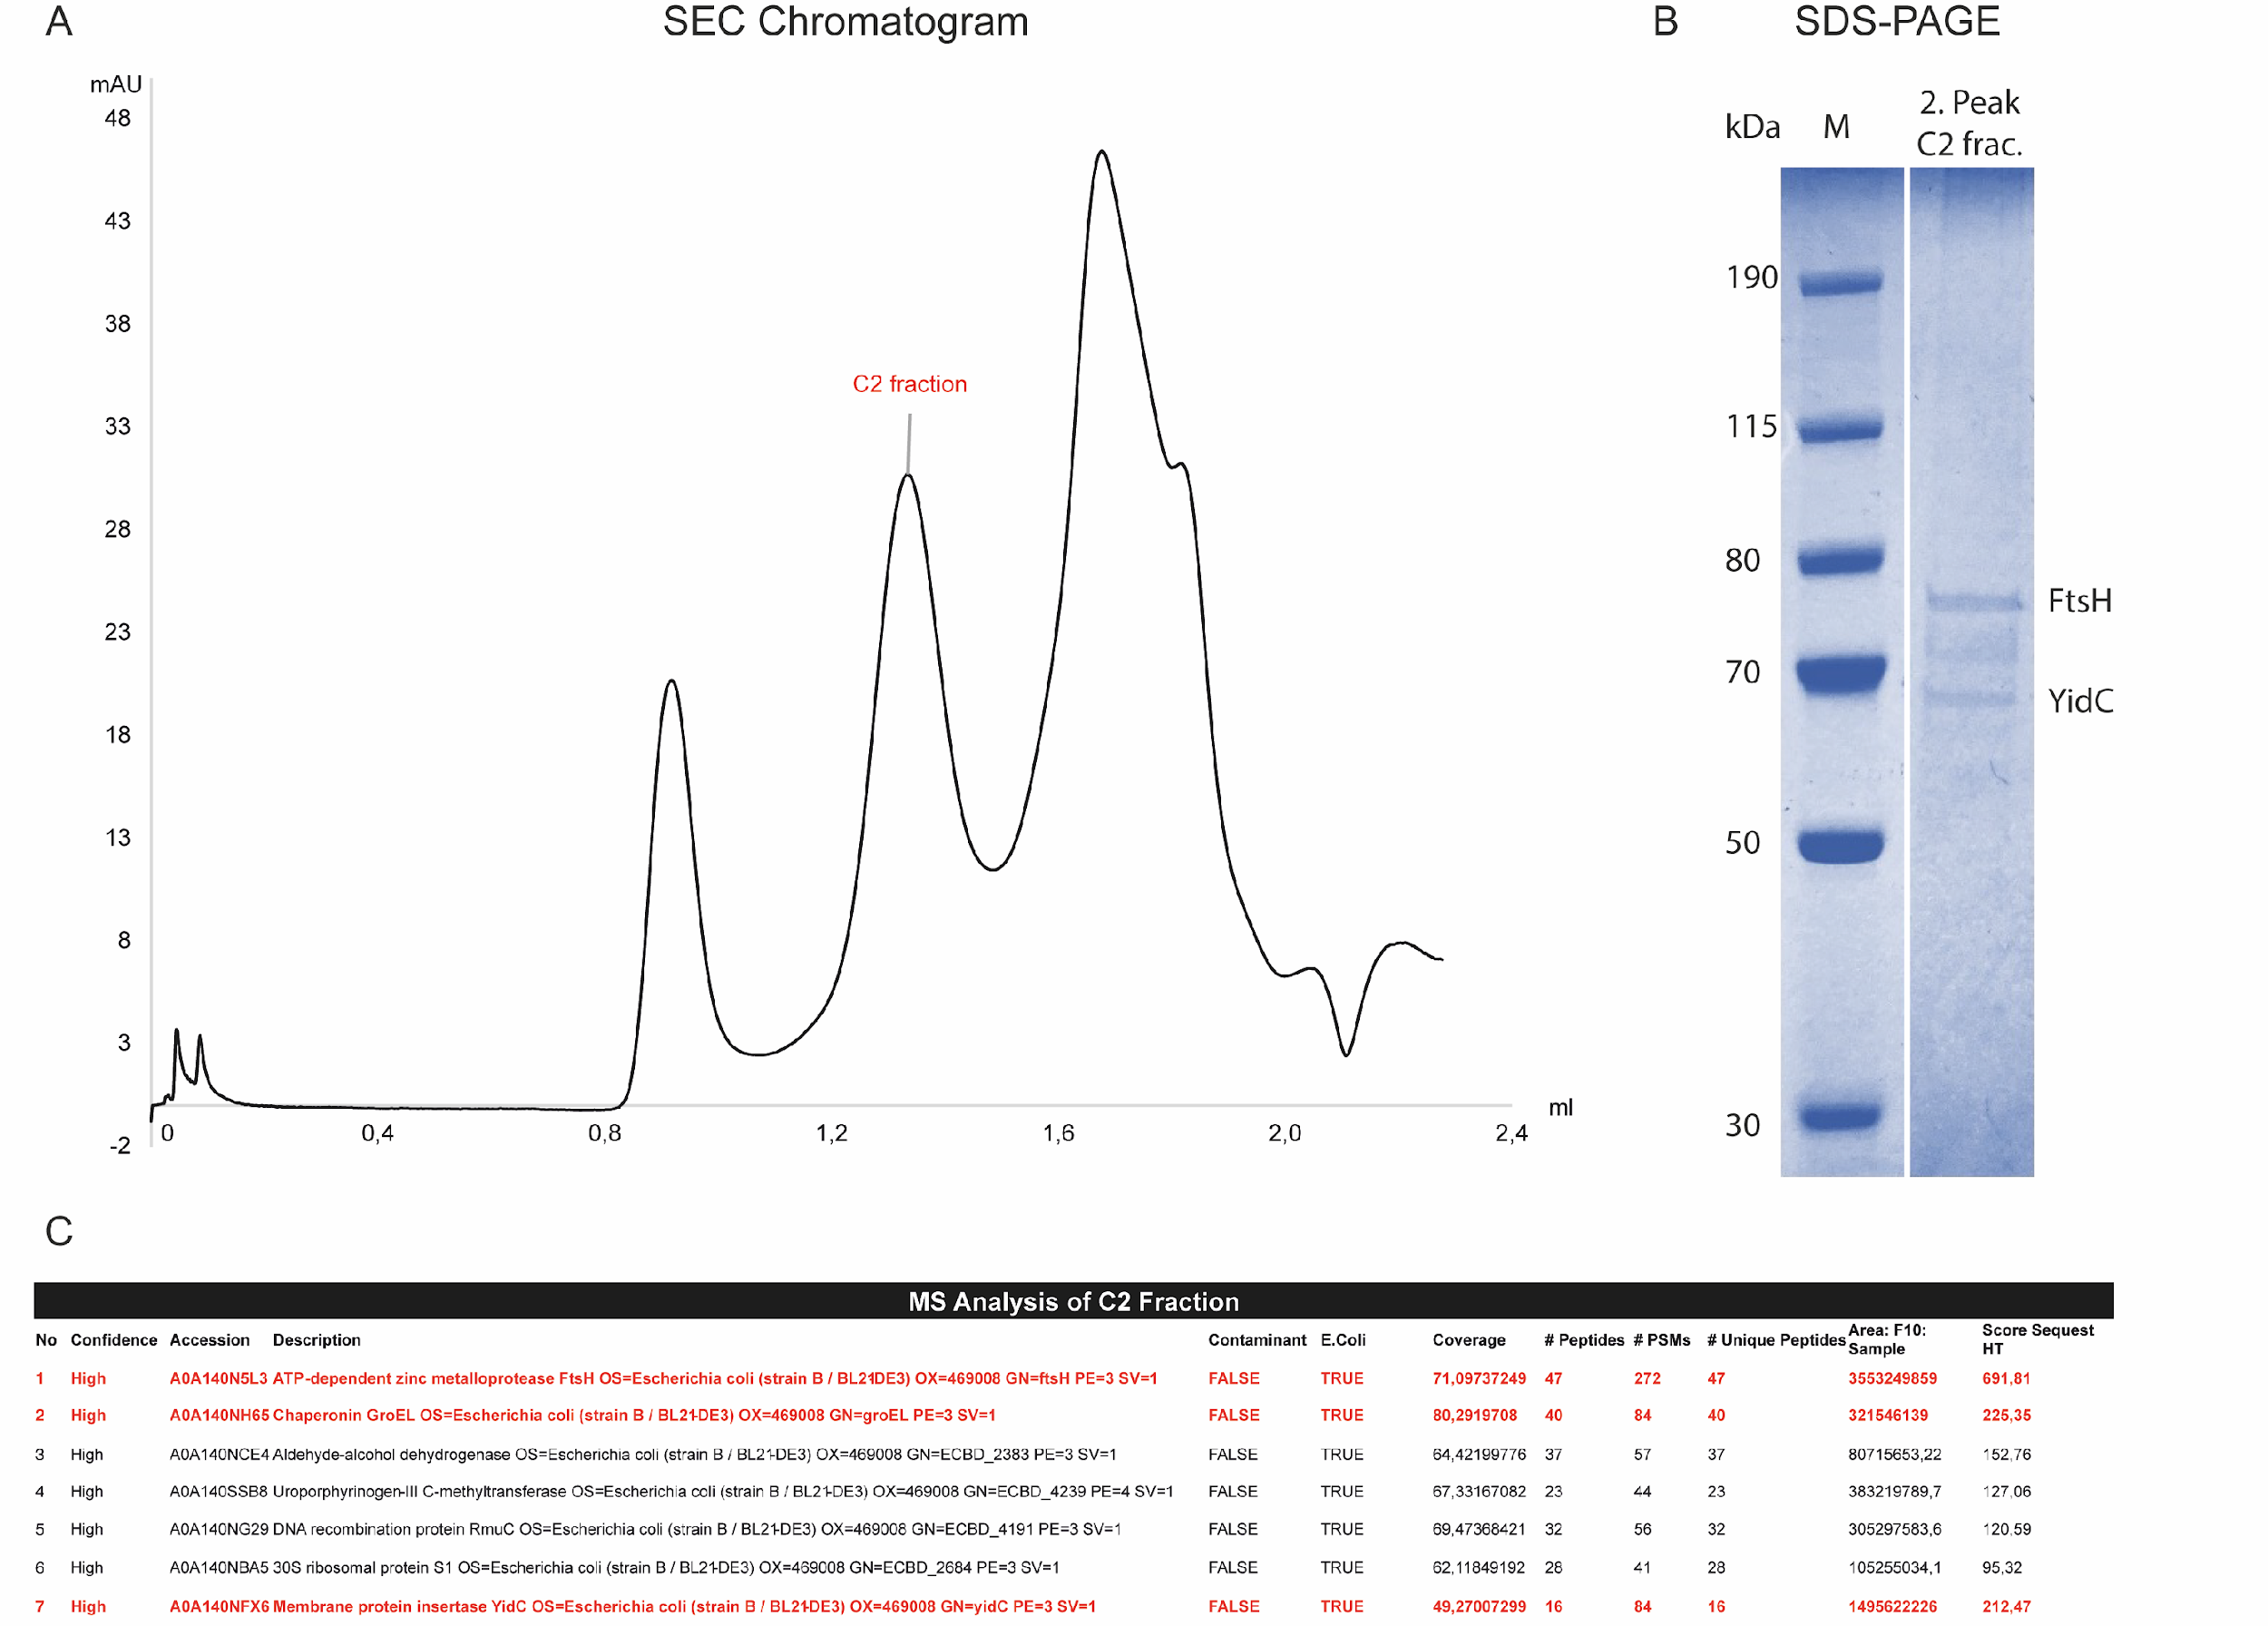
**

**Sup. Fig. 2. SEC Purification and MS Analysis of FtsH, HflKC, and YidC Produced via the FYHC Co-T Expression System.** FtsH, HflKC, and YidC proteins, expressed using the FYHC Co-T expression system and purified via Ni-NTA affinity chromatography, were further purified by size-exclusion chromatography (SEC) and analyzed by mass spectrometry (MS). Prior to Ni-NTA purification, the solubilized membrane fraction was treated with 0.25 mM DSP crosslinker. Ni-NTA fractions were concentrated using an Amicon® Ultra Centrifugal Filter (100 kDa MWCO). 3 mg/ml concentrated Ni-NTA purified fractionswere then loaded onto a Superose 6 Increase 3.2/300 column for SEC purification. The chromatography was performed using an AKTAmicro device with a flow rate of 0.05 ml/min. SEC Buffer:20 mMHEPES, 150 mM NaCl, 0.01% DDM, pH 8. TheC2 fraction was collected in liquid form and sent for MS analysis.A. SEC chromatogram. B. SDS-PAGE gel. M: Marker. C. MS analysis of C2 fraction.


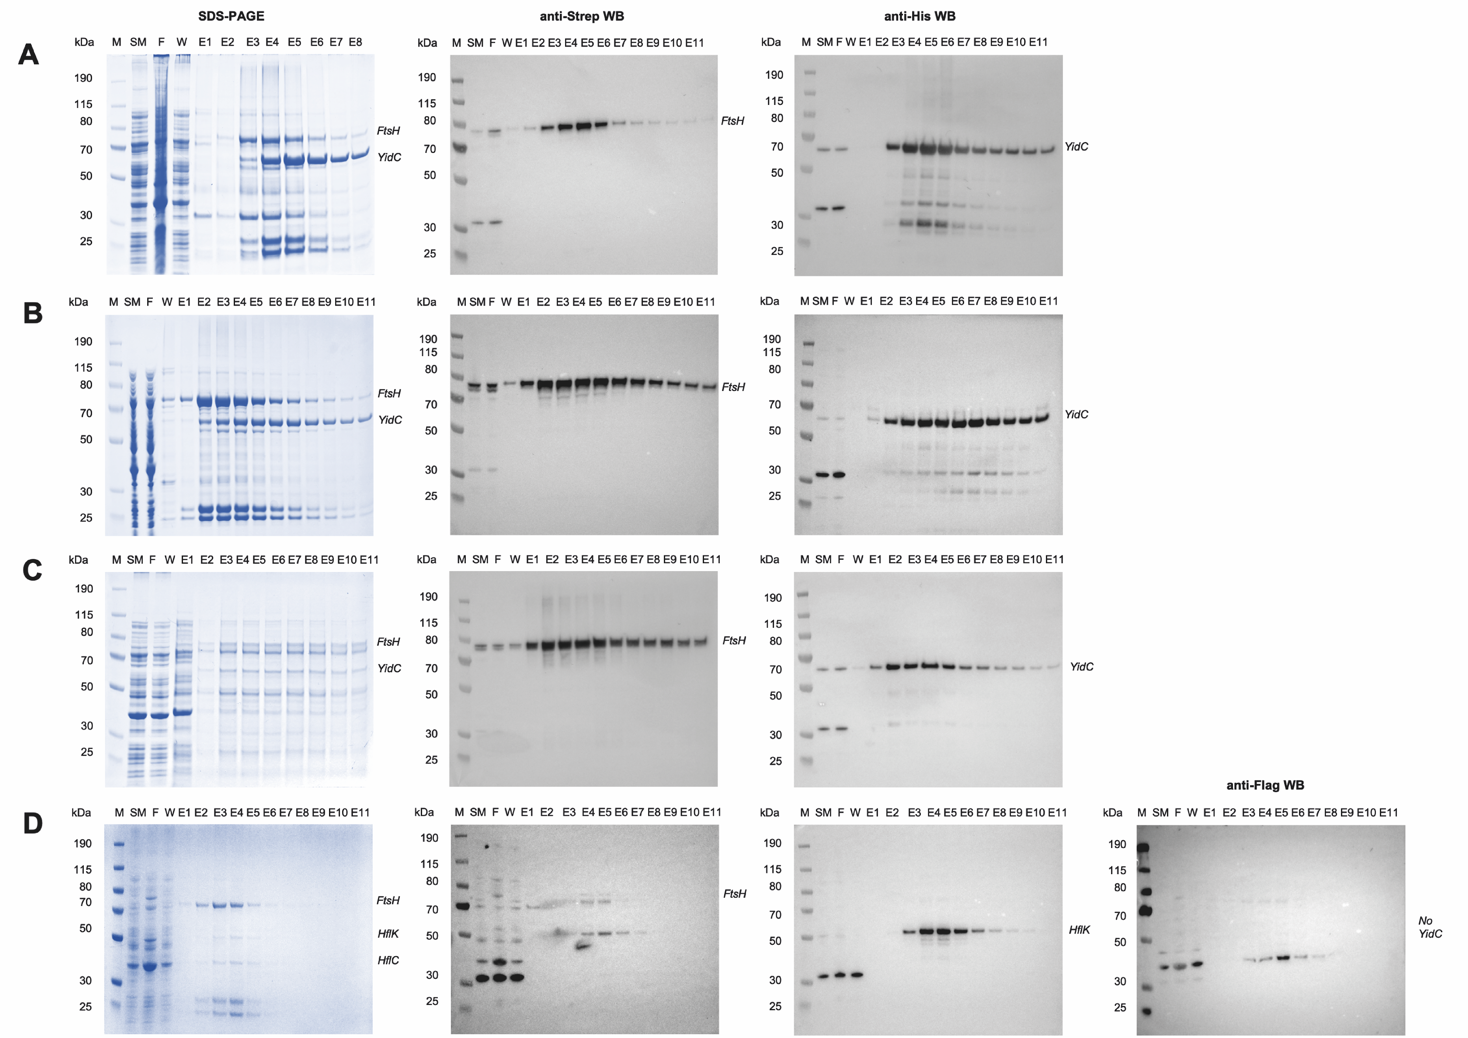


**Sup. Fig. 3.** **SDS-PAGE Western Blot Analysis of YidC Co-purification with FtsH and HflKC.** Expressions of FtsH, YidC, and HflKC proteins were carried out using FYHC co-T (panels A-C) and pFYHC (panel D) expression systems. Membrane proteins were purified using either Ni-NTA (panels A, B) or Strep-Tactin (C,D) affinity purification. In the crosslinker (+) condition (panel B), membranes were treated with 0.25 mM DSP, followed by Ni-NTA purification. For others, no crosslinker was used. Appropriate HRP-conjugated antibodies for the protein tags (e.g., anti-His, anti-Strep, anti-Flag) were used for Western Blot analysis. Samples; M: Marker, SM: Solubilized Membrane, F: Flow, W: Wash, E(Number): Elution.


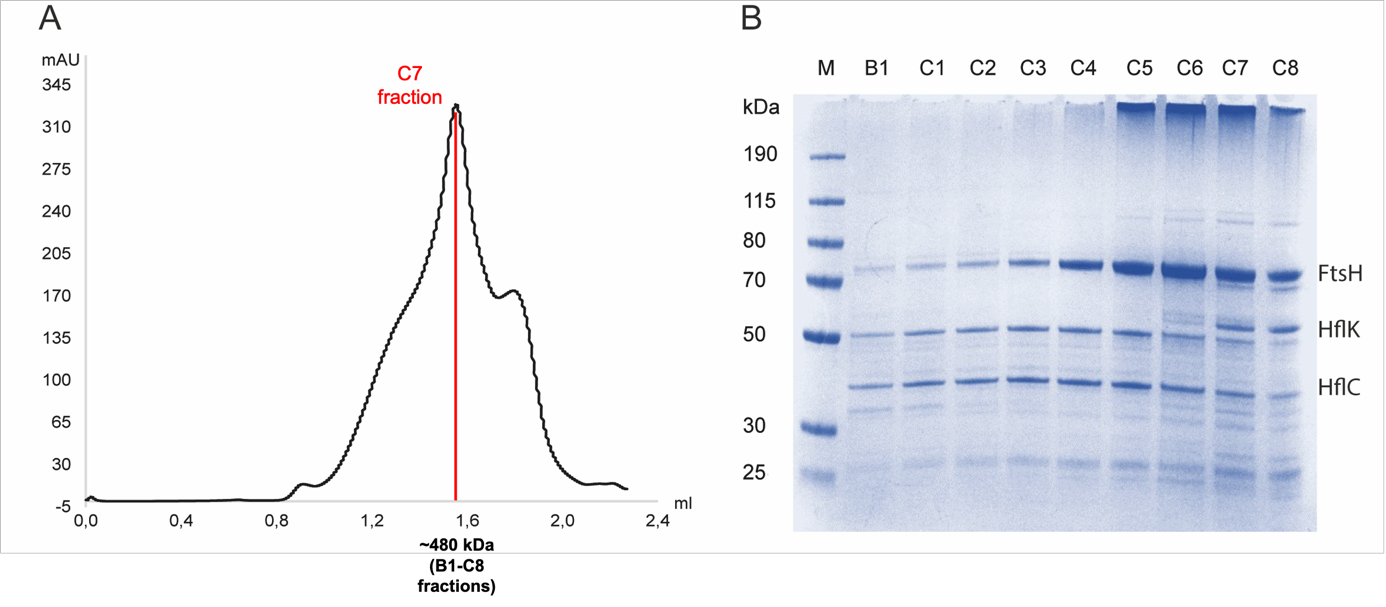


**Sup. Fig. 4.** **SEC Purification of FtsH, HflKC, and YidC Produced via the FYHC Co-T Expression System.** Ni-NTA fractions (Supp. Fig.3D) were concentrated using an Amicon® Ultra Centrifugal Filter (100 kDa MWCO). 6 mg/ml concentrated Ni-NTA purified fractionswere then loaded onto a Superose 6 Increase 3.2/300 column for SEC purification. The chromatography was performed using an AKTAmicro device with a flow rate of 0.05 ml/min. SEC Buffer**:** 20 mMHEPES, 150 mM NaCl, 0.01% DDM, pH 8. SEC fractions from the peak loaded to gel.A. SEC chromatogram. B. SDS-PAGE gel. M: Marker. B1-C8 are SEC fractions.
